# Supplementary material for: Different N-Glycosylation Sites Reduce the Activity of Recombinant DSPAα2
Source: MDPI journal article supplement (doi:10.3390/cimb44090270), 2022-08-31
Supplement: s1 [file s1]

**Table S2.** Protein yields of rDSPA $\alpha$ 2 and its mutants after purification.

| Samples            | Yields (IU in mg of protein /g of cell dry weight) |
|--------------------|----------------------------------------------------|
| rDSPA $\alpha$ 2   | 6629                                               |
| QNGly $\alpha$ 2   | 398                                                |
| QNGly $\alpha$ 2-1 | 5021                                               |
| QNGly $\alpha$ 2-2 | 119                                                |
| ANGly $\alpha$ 2+1 | 2932                                               |
| ANGly $\alpha$ 2+U | 319                                                |
