# Supplementary material for: Different N-Glycosylation Sites Reduce the Activity of Recombinant DSPAα2
Source: MDPI journal article supplement (doi:10.3390/cimb44090270), 2022-08-31
Supplement: s1 [file s1]

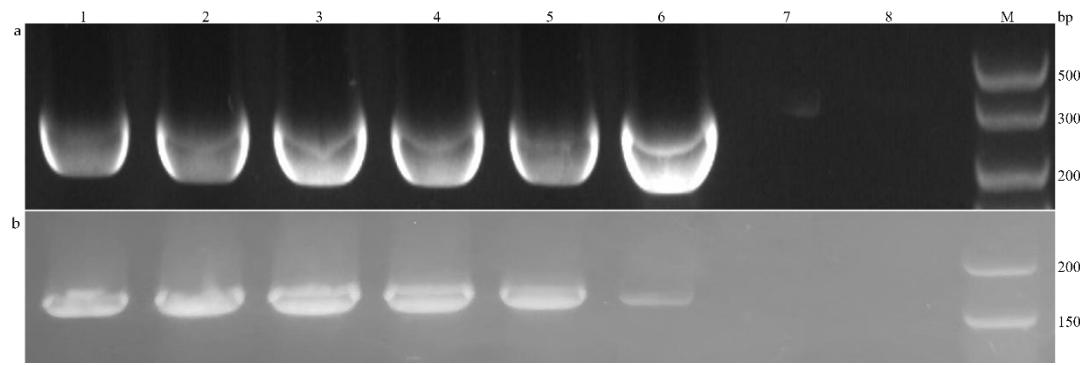

**Figure S3.** PCR and RTPCR detection. **(a)** PCR. **(b)** RT-PCR; lane 1-8: rDSPA $\alpha$ 2, QNGly $\alpha$ 2, QNGly $\alpha$ 2-1, QNGly $\alpha$ 2-2, ANGly $\alpha$ 2+1, ANGly $\alpha$ 2+U, GS115, CK; M: Marker.
