# Supplementary material for: Different N-Glycosylation Sites Reduce the Activity of Recombinant DSPAα2
Source: MDPI journal article supplement (doi:10.3390/cimb44090270), 2022-08-31
Supplement: s1 [file s1]

**Table S1.** The oligonucleotide primers used in this study.

| Primers                  | sequences                                                   |
|--------------------------|-------------------------------------------------------------|
| GAP-F                    | gacgcatgtcatgagattattgga                                    |
| AOX-R                    | ggcaaatggcattctgacatcctc                                    |
| ANGly $\alpha$ 2+U-F     | tggctacggcaagcataactcctcttctcctttctattct                    |
| ANGly $\alpha$ 2+U-R     | agaatagaaaggagaagaggagttagcttgccgtagcca                     |
| ANGly $\alpha$ 2+1-F     | acagtgtatcaactggaactcctcccttctgaccaggaggacctacaatg          |
| ANGly $\alpha$ 2+1-R     | tctcctggtcagaaggaggaggtccagttgatacactgtgccccactt            |
| QNGly $\alpha$ 2-1-F     | aaccagatcaaaactccaagccttggtgc                               |
| QNGly $\alpha$ 2-1-R     | gcaccaaggcttgagttttgatctgggtt                               |
| QNGly $\alpha$ 2-2-F     | tttctgttcaaaaaaccgtcacaacaac                                |
| QNGly $\alpha$ 2-2-R     | gttggttgacgggtttttgaaacagaaa                                |
| DSPA $\alpha$ 2-9KY-F    | aaggaggagggtgttccctcgagaaaagagcttatggtgtgcctgcagagacgaaaa   |
| DSPA $\alpha$ 2His-9KY-R | agtcatgtctaaggcgaaattcgcttagtggtgatggtgatggtgtgggcgcattgtgc |
