# Supplementary material for: Different N-Glycosylation Sites Reduce the Activity of Recombinant DSPAα2
Source: MDPI journal article supplement (doi:10.3390/cimb44090270), 2022-08-31
Supplement: s1 [file s1]

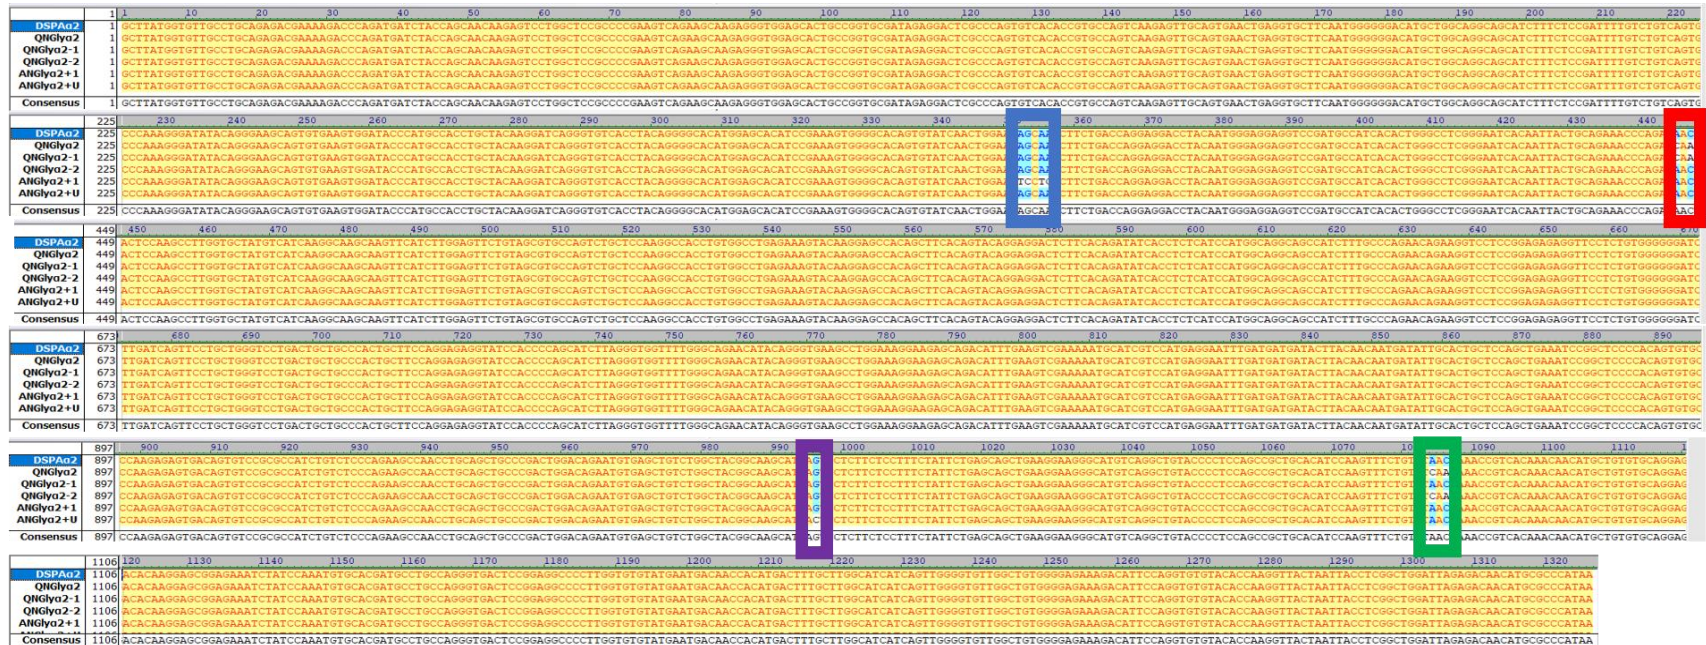

**Figure S2.** Alignment of nucleotide sequence for the DSPA2 wildtype and mutants. The blue box identifies the nucleotide mutation sites of ANGLyα2+1; the red box identifies the nucleotide mutation sites of QNGlyα2 and QNGlyα2-1; the purple box identifies the nucleotide mutation sites of ANGLyα2+U; the green box identifies the nucleotide mutation sites of QNGlyα2 and QNGlyα2-2.
