# Supplementary material for: Different N-Glycosylation Sites Reduce the Activity of Recombinant DSPAα2
Source: MDPI journal article supplement (doi:10.3390/cimb44090270), 2022-08-31
Supplement: s1 [file s1]

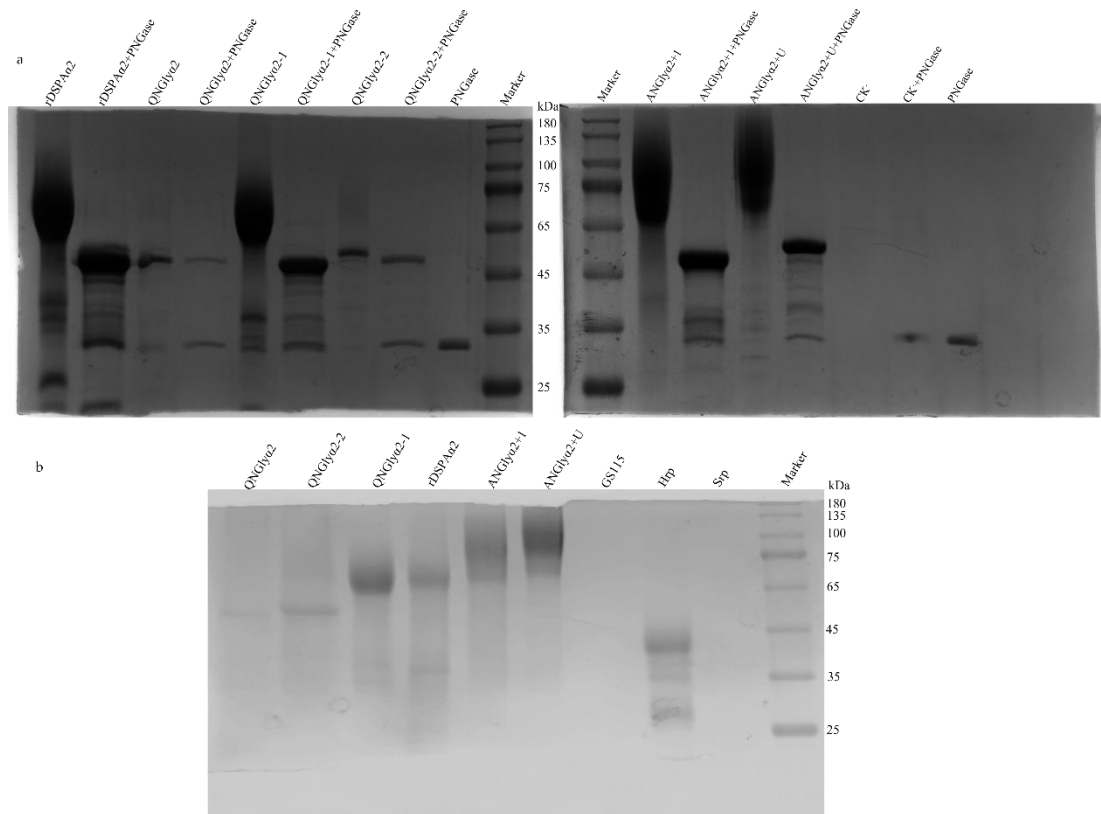

**Figure S4.** The full-length gels. **(a)** the full-length gels of Coomassie blue staining. **(b)** the full-length gels of Carbohydrate staining. Lane CK-, the cultivated supernatant of untransformed *Pichia pastoris*; Lane Hrp, horseradish peroxidase; Lane Srp: soy trypsin; Lane Marker, molecular mass markers purchased from Zoman Bio.
