# Supplementary material for: Different N-Glycosylation Sites Reduce the Activity of Recombinant DSPAα2
Source: Curr Issues Mol Biol. 2022 Aug 31;44(9):3930–47. doi: 10.3390/cimb44090270 (PMC9497888; doi:10.3390/cimb44090270)
Supplement: Supplementary file 1 [file cimb-44-00270-s001.zip]

Archive with 7 entries (7 files):
- Figure S1. The predicted Nglycosylation sites of DSPAα2. .pdf
- Figure S2. Alignment of nucleotide sequence for the DSPAα2 wildtype and mutants.pdf
- Figure S3 PCR and RTPCR detection.pdf
- Figure S4 The full-length gels.pdf
- Figure S5. The fitted Michaelis-Menten curves.pdf
- Table S1. The oligonucleotide primers used in this study.pdf
- Table S2. Protein yields of rDSPAα2 and its mutants after purification.pdf
