# Supplementary figures and images for: Different N-Glycosylation Sites Reduce the Activity of Recombinant DSPAα2
Source: MDPI journal article supplement (doi:10.3390/cimb44090270), 2022-08-31

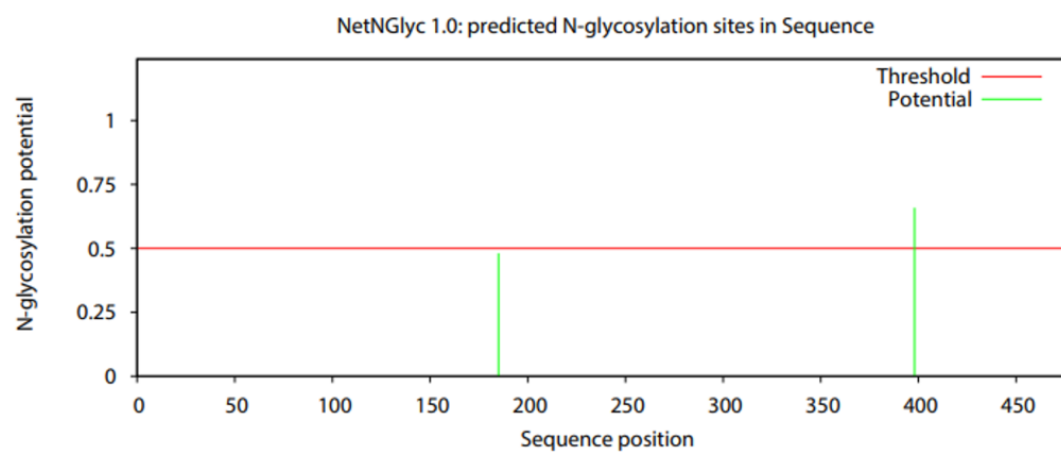

**Figure S1.** The predicted Nglycosylation sites of DSPA $\alpha$ 2. The predicted sites were N185 and N398.

Supplement: s1 [file s1]

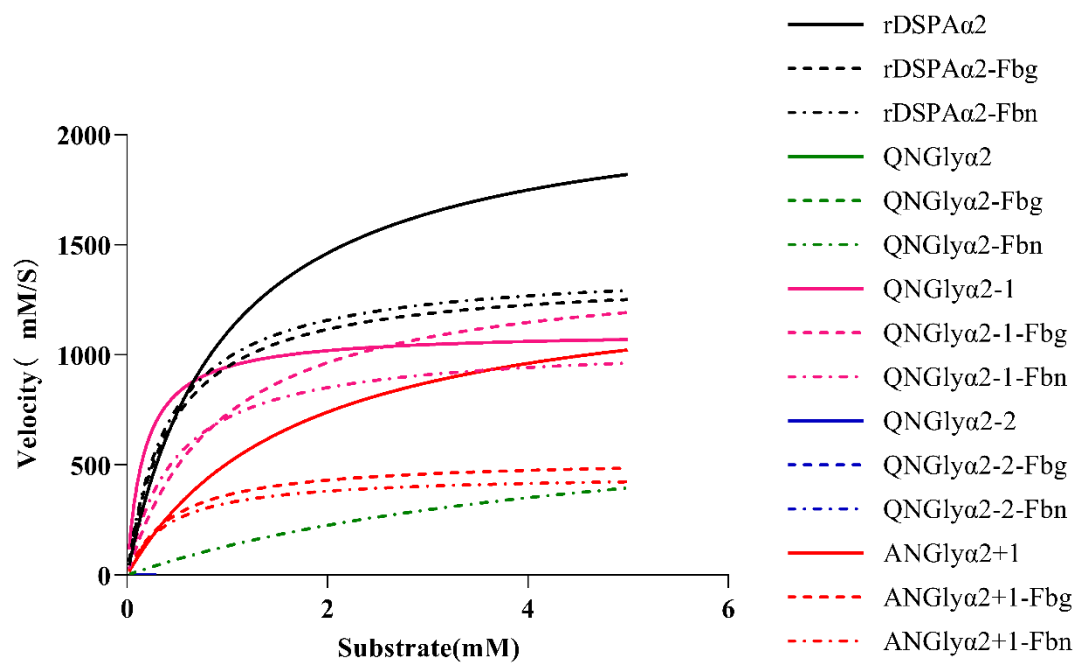

Figure S5. The fitted Michaelis-Menten curves.

Supplement: s1 [file s1]
